# Supplementary material for: Ciprofloxacin- and levofloxacin-loaded nanoparticles efficiently suppressed fluoroquinolone resistance and biofilm formation in Acinetobacter baumannii
Source: PubMed Central journal article supplement (PMC10850473; doi:10.1038/s41598-024-53441-1), 2024-02-07
Supplement: 41598_2024_53441_MOESM1_ESM.pdf [file 41598_2024_53441_MOESM1_ESM.pdf]

## Supplementary materials

### **Ciprofloxacin- and Levofloxacin-Loaded Nanoparticles Efficiently Suppressed Fluoroquinolone Resistance and Biofilm Formation in *Acinetobacter baumannii***

Alaa M. Aboelenin <sup>1</sup>, Mohammed El-Mowafy <sup>1</sup>, Noha M. Saleh <sup>2</sup>, Mona I. Shaaban <sup>1\*</sup> and Rasha Barwa <sup>1\*\*</sup>.

<sup>1</sup>Department of Microbiology and Immunology, Faculty of Pharmacy, Mansoura University, PO Box 35516, Mansoura, Egypt

<sup>2</sup>Department of Pharmaceutics, Faculty of Pharmacy, Mansoura University, PO Box 35516, Mansoura, Egypt

\* **Correspondence:** mona\_ibrahim@mans.edu.eg

\*\***Co- correspondence:** rasha@mans.edu.eg

**Supplementary Table S1.** *A. baumannii* isolates identified in this study and their clinical sources.

| <b>Isolate Code</b> | <b>Clinical source</b> | <b>Isolate Code</b> | <b>Clinical source</b> | <b>Isolate Code</b> | <b>Clinical source</b> |
|---------------------|------------------------|---------------------|------------------------|---------------------|------------------------|
| <b>Ab1</b>          | blood                  | <b>Ab28</b>         | blood                  | <b>Ab55</b>         | Wound                  |
| <b>Ab2</b>          | blood                  | <b>Ab29</b>         | sputum                 | <b>Ab56</b>         | Wound                  |
| <b>Ab3</b>          | blood                  | <b>Ab30</b>         | sputum                 | <b>Ab57</b>         | Wound                  |
| <b>Ab4</b>          | blood                  | <b>Ab31</b>         | sputum                 | <b>Ab58</b>         | Wound                  |
| <b>Ab5</b>          | blood                  | <b>Ab32</b>         | sputum                 | <b>Ab59</b>         | Wound                  |
| <b>Ab6</b>          | blood                  | <b>Ab33</b>         | sputum                 | <b>Ab60</b>         | Wound                  |
| <b>Ab7</b>          | blood                  | <b>Ab34</b>         | sputum                 | <b>Ab61</b>         | Wound                  |
| <b>Ab8</b>          | blood                  | <b>Ab35</b>         | sputum                 | <b>Ab62</b>         | Wound                  |
| <b>Ab9</b>          | blood                  | <b>Ab36</b>         | sputum                 | <b>Ab63</b>         | Wound                  |
| <b>Ab10</b>         | blood                  | <b>Ab37</b>         | sputum                 | <b>Ab64</b>         | Wound                  |
| <b>Ab11</b>         | blood                  | <b>Ab38</b>         | sputum                 | <b>Ab65</b>         | Wound                  |
| <b>Ab12</b>         | blood                  | <b>Ab39</b>         | sputum                 | <b>Ab66</b>         | Wound                  |
| <b>Ab13</b>         | blood                  | <b>Ab40</b>         | sputum                 | <b>Ab67</b>         | Wound                  |
| <b>Ab14</b>         | blood                  | <b>Ab41</b>         | sputum                 | <b>Ab68</b>         | Wound                  |
| <b>Ab15</b>         | blood                  | <b>Ab42</b>         | sputum                 | <b>Ab69</b>         | Wound                  |
| <b>Ab16</b>         | blood                  | <b>Ab43</b>         | sputum                 | <b>Ab70</b>         | Wound                  |
| <b>Ab17</b>         | blood                  | <b>Ab44</b>         | sputum                 | <b>Ab71</b>         | Wound                  |
| <b>Ab18</b>         | blood                  | <b>Ab45</b>         | sputum                 | <b>Ab72</b>         | Wound                  |
| <b>Ab19</b>         | blood                  | <b>Ab46</b>         | sputum                 | <b>Ab73</b>         | Wound                  |
| <b>Ab20</b>         | blood                  | <b>Ab47</b>         | sputum                 | <b>Ab74</b>         | Wound                  |
| <b>Ab21</b>         | blood                  | <b>Ab48</b>         | sputum                 | <b>Ab75</b>         | Wound                  |
| <b>Ab22</b>         | blood                  | <b>Ab49</b>         | sputum                 | <b>Ab76</b>         | Wound                  |
| <b>Ab23</b>         | blood                  | <b>Ab50</b>         | sputum                 | <b>Ab77</b>         | Urine                  |
| <b>Ab24</b>         | blood                  | <b>Ab51</b>         | sputum                 | <b>Ab78</b>         | Urine                  |
| <b>Ab25</b>         | blood                  | <b>Ab52</b>         | sputum                 | <b>Ab79</b>         | Urine                  |
| <b>Ab26</b>         | blood                  | <b>Ab53</b>         | sputum                 | <b>Ab80</b>         | Urine                  |
| <b>Ab27</b>         | blood                  | <b>Ab54</b>         | sputum                 |                     |                        |

**Supplementary Table S2.** Resistance pattern of *A. baumannii* clinical isolates and standard strains *A. baumannii* ATCC 19606 and 17978 to different antimicrobial agents.

| Isolate code | Antimicrobial agents |     |     |     |     |     |            |     |                 |    |            |               |     | Resistance pattern |
|--------------|----------------------|-----|-----|-----|-----|-----|------------|-----|-----------------|----|------------|---------------|-----|--------------------|
|              | β-Lactams            |     |     |     |     |     | Quinolones |     | Aminoglycosides |    | Sulfa drug | Tetracyclines |     |                    |
|              | CAZ                  | FEP | CTX | TZP | SAM | IPM | CIP        | LEV | AK              | CN | SXT        | DO            | MIN | XDR isolate        |
| Ab1          | R                    | R   | R   | R   | R   | R   | R          | R   | S               | R  | R          | R             | R   | Yes                |
| Ab2          | R                    | R   | R   | R   | R   | R   | R          | R   | R               | R  | R          | R             | S   | Yes                |
| Ab3          | R                    | R   | R   | R   | R   | R   | R          | R   | R               | R  | R          | S             | S   | Yes                |
| Ab4          | R                    | R   | R   | R   | R   | R   | R          | R   | R               | R  | R          | S             | S   | Yes                |
| Ab5          | R                    | R   | R   | R   | R   | R   | R          | R   | R               | R  | R          | S             | R   | Yes                |
| Ab6          | R                    | R   | R   | R   | R   | R   | R          | R   | R               | R  | R          | R             | R   | Yes                |
| Ab7          | R                    | R   | R   | R   | R   | R   | R          | R   | R               | R  | R          | R             | R   | Yes                |
| Ab8          | R                    | R   | R   | R   | R   | R   | R          | R   | R               | R  | R          | R             | I   | Yes                |
| Ab9          | R                    | R   | R   | R   | R   | R   | R          | R   | R               | R  | R          | S             | S   | Yes                |
| Ab10         | R                    | R   | R   | R   | R   | R   | R          | R   | R               | R  | R          | S             | S   | Yes                |
| Ab11         | R                    | R   | R   | R   | R   | R   | R          | R   | R               | R  | R          | S             | S   | Yes                |
| Ab12         | R                    | R   | R   | R   | R   | R   | R          | R   | R               | R  | R          | S             | S   | Yes                |
| Ab13         | R                    | R   | R   | R   | R   | R   | R          | R   | R               | R  | R          | S             | S   | Yes                |
| Ab14         | R                    | R   | R   | R   | R   | R   | R          | R   | R               | R  | R          | S             | S   | Yes                |
| Ab15         | R                    | R   | R   | R   | R   | R   | R          | R   | R               | R  | R          | S             | S   | Yes                |
| Ab16         | R                    | R   | R   | R   | R   | R   | R          | R   | R               | R  | R          | R             | R   | Yes                |
| Ab17         | R                    | R   | R   | R   | R   | R   | R          | R   | R               | R  | I          | S             | S   | Yes                |
| Ab18         | R                    | R   | R   | R   | R   | R   | R          | R   | R               | R  | R          | R             | R   | Yes                |
| Ab19         | R                    | R   | R   | R   | R   | R   | R          | R   | R               | R  | R          | R             | R   | Yes                |
| Ab20         | R                    | R   | R   | R   | R   | R   | R          | R   | R               | S  | R          | S             | S   | Yes                |
| Ab21         | R                    | R   | R   | R   | R   | R   | R          | R   | R               | R  | R          | S             | R   | Yes                |
| Ab22         | R                    | R   | R   | R   | R   | R   | R          | R   | R               | R  | R          | R             | I   | Yes                |
| Ab23         | R                    | R   | R   | R   | R   | R   | R          | R   | R               | R  | R          | R             | R   | Yes                |
| Ab24         | R                    | R   | R   | R   | R   | R   | R          | R   | R               | S  | R          | S             | S   | Yes                |
| Ab25         | R                    | R   | R   | R   | R   | R   | R          | R   | R               | R  | R          | R             | R   | Yes                |
| Ab26         | R                    | R   | R   | R   | R   | R   | R          | R   | R               | R  | R          | S             | S   | Yes                |
| Ab27         | R                    | R   | R   | R   | R   | R   | R          | R   | R               | R  | R          | S             | S   | Yes                |
| Ab28         | R                    | R   | R   | R   | R   | R   | R          | R   | R               | R  | R          | S             | R   | Yes                |
| Ab29         | R                    | R   | R   | R   | R   | R   | R          | R   | R               | R  | R          | R             | R   | Yes                |
| Ab30         | R                    | R   | R   | R   | R   | R   | R          | R   | R               | R  | R          | S             | R   | Yes                |
| Ab31         | R                    | R   | R   | R   | R   | R   | R          | R   | R               | R  | R          | I             | R   | Yes                |
| Ab32         | R                    | R   | R   | R   | R   | R   | R          | R   | R               | R  | R          | S             | I   | Yes                |
| Ab33         | R                    | R   | R   | R   | R   | R   | R          | R   | R               | R  | R          | S             | R   | Yes                |
| Ab34         | R                    | R   | R   | R   | R   | R   | R          | R   | R               | R  | R          | I             | R   | Yes                |
| Ab35         | R                    | R   | R   | R   | R   | R   | R          | R   | R               | R  | R          | S             | S   | Yes                |
| Ab36         | R                    | R   | R   | R   | R   | R   | R          | R   | R               | R  | R          | S             | I   | Yes                |
| Ab37         | R                    | R   | R   | R   | R   | R   | R          | R   | R               | R  | R          | S             | S   | Yes                |
| Ab38         | R                    | R   | R   | R   | R   | R   | R          | R   | R               | R  | R          | S             | R   | Yes                |
| Ab39         | R                    | R   | R   | R   | R   | R   | R          | R   | R               | R  | R          | S             | R   | Yes                |
| Ab40         | R                    | R   | R   | R   | R   | R   | R          | R   | R               | R  | R          | I             | R   | Yes                |
| Ab41         | R                    | R   | R   | R   | R   | R   | R          | R   | R               | I  | R          | R             | R   | Yes                |
| Ab42         | R                    | R   | R   | R   | R   | R   | R          | R   | R               | I  | R          | R             | R   | Yes                |
| Ab43         | R                    | R   | R   | R   | R   | R   | R          | R   | R               | R  | R          | S             | S   | Yes                |
| Ab44         | R                    | R   | R   | R   | R   | R   | R          | R   | R               | R  | R          | R             | R   | Yes                |
| Ab45         | R                    | R   | R   | R   | R   | R   | R          | R   | R               | R  | R          | R             | R   | Yes                |
| Ab46         | R                    | R   | R   | R   | S   | S   | S          | S   | S               | S  | R          | S             | S   | No                 |
| Ab47         | R                    | R   | R   | R   | R   | R   | R          | R   | R               | R  | R          | S             | S   | Yes                |
| Ab48         | R                    | R   | R   | R   | R   | R   | R          | R   | R               | R  | R          | R             | S   | Yes                |
| Ab49         | R                    | R   | R   | R   | R   | R   | R          | R   | R               | R  | R          | R             | R   | Yes                |
| Ab50         | R                    | R   | R   | R   | R   | R   | R          | R   | R               | R  | R          | R             | R   | Yes                |
| Ab51         | R                    | R   | R   | R   | R   | R   | R          | R   | R               | R  | R          | S             | S   | Yes                |
| Ab52         | R                    | R   | R   | R   | R   | R   | R          | R   | R               | R  | R          | R             | R   | Yes                |
| Ab53         | R                    | R   | R   | R   | R   | R   | R          | R   | R               | R  | R          | R             | R   | Yes                |
| Ab54         | R                    | R   | R   | R   | R   | R   | R          | R   | R               | R  | R          | R             | R   | Yes                |

|                                        |          |         |         |         |           |           |           |           |         |           |           |         |           |           |
|----------------------------------------|----------|---------|---------|---------|-----------|-----------|-----------|-----------|---------|-----------|-----------|---------|-----------|-----------|
| Ab55                                   | R        | R       | R       | R       | R         | R         | R         | R         | R       | R         | R         | S       | S         | Yes       |
| Ab56                                   | R        | R       | R       | R       | R         | R         | R         | R         | R       | R         | R         | S       | S         | Yes       |
| Ab57                                   | R        | R       | R       | R       | R         | R         | R         | R         | R       | R         | R         | R       | R         | Yes       |
| Ab58                                   | R        | S       | S       | S       | S         | S         | S         | S         | S       | S         | S         | S       | S         | No        |
| Ab59                                   | R        | R       | R       | R       | R         | R         | R         | R         | R       | R         | R         | R       | S         | Yes       |
| Ab60                                   | R        | R       | R       | R       | R         | R         | R         | R         | R       | R         | R         | R       | S         | Yes       |
| Ab61                                   | R        | R       | R       | R       | R         | R         | R         | R         | R       | R         | S         | R       | S         | Yes       |
| Ab62                                   | R        | R       | R       | R       | R         | R         | R         | R         | R       | R         | S         | R       | S         | Yes       |
| Ab63                                   | R        | R       | R       | R       | R         | R         | R         | R         | R       | R         | S         | R       | S         | Yes       |
| Ab64                                   | R        | R       | R       | R       | R         | R         | R         | R         | R       | R         | S         | R       | S         | Yes       |
| Ab65                                   | R        | R       | R       | R       | R         | R         | R         | R         | R       | R         | S         | R       | S         | Yes       |
| Ab66                                   | R        | R       | R       | R       | R         | R         | R         | R         | R       | R         | R         | R       | R         | Yes       |
| Ab67                                   | R        | R       | R       | R       | R         | R         | R         | R         | R       | R         | R         | R       | R         | Yes       |
| Ab68                                   | R        | R       | R       | R       | R         | R         | R         | R         | R       | R         | R         | R       | R         | Yes       |
| Ab69                                   | R        | R       | R       | R       | R         | R         | R         | R         | R       | R         | S         | R       | S         | Yes       |
| Ab70                                   | R        | R       | R       | R       | R         | R         | R         | R         | R       | R         | R         | R       | R         | Yes       |
| Ab71                                   | R        | R       | R       | R       | R         | R         | R         | R         | R       | R         | R         | R       | R         | Yes       |
| Ab72                                   | R        | R       | R       | R       | R         | R         | R         | R         | R       | R         | S         | R       | S         | Yes       |
| Ab73                                   | R        | R       | R       | R       | R         | R         | R         | R         | R       | R         | R         | R       | R         | Yes       |
| Ab74                                   | R        | R       | R       | R       | R         | R         | R         | R         | R       | R         | R         | R       | R         | Yes       |
| Ab75                                   | R        | R       | R       | R       | R         | R         | R         | R         | R       | R         | R         | R       | R         | Yes       |
| Ab76                                   | R        | R       | R       | R       | R         | R         | R         | R         | R       | R         | S         | R       | S         | Yes       |
| Ab77                                   | R        | R       | R       | R       | R         | R         | R         | R         | R       | R         | S         | R       | S         | Yes       |
| Ab78                                   | R        | R       | R       | R       | R         | R         | R         | R         | R       | R         | R         | R       | R         | Yes       |
| Ab79                                   | R        | R       | R       | R       | R         | R         | R         | R         | R       | R         | S         | R       | S         | Yes       |
| Ab80                                   | R        | R       | R       | R       | R         | R         | R         | R         | S       | R         | S         | R       | S         | Yes       |
| ATCC 19606                             | R        | R       | R       | R       | R         | S         | S         | S         | S       | S         | R         | S       | S         | No        |
| ATCC 17987                             | S        | S       | S       | S       | S         | S         | S         | S         | S       | S         | R         | S       | S         | No        |
| Total number of resistant isolates (%) | 80 (100) | 79 (99) | 79 (99) | 79 (99) | 78 (97.5) | 78 (97.5) | 78 (97.5) | 78 (97.5) | 76 (95) | 74 (92.5) | 67 (83.8) | 44 (55) | 39 (48.8) | 78 (97.5) |

CAZ: ceftazidime, FEP: cefepime, CTX: cefotaxime, TZP: tazobactam/piperacillin, SAM: sulbactam /ampicillin, IPM: imipenem, CIP: ciprofloxacin, LEV: levofloxacin, AK: amikacin, CN: gentamicin, SXT: sulfamethoxazole/trimethoprim, DO: doxycycline, MIN: minocycline, XDR: extensively drug-resistant, **R**: resistant, **I**: intermediate, and **S**: sensitive.

**Supplementary Table S3.** Molecular characterization of resistance mechanisms of *A. baumannii* isolates and standard strains *A. baumannii* ATCC 19606 and 17978 to fluoroquinolones.

| Isolate code | Fluoroquinolone-resistance determining regions |               |                  |               | Plasmid-mediated quinolone resistance genes ( <i>qnrA</i> , <i>qnrB</i> , <i>qnrC</i> , <i>qnrD</i> , <i>qepA</i> , and <i>oqxAB</i> genes were absent in all isolates) |                  |                                          |
|--------------|------------------------------------------------|---------------|------------------|---------------|-------------------------------------------------------------------------------------------------------------------------------------------------------------------------|------------------|------------------------------------------|
|              | <i>gyrA</i> gene                               |               | <i>parC</i> gene |               | <i>aac(6')-Ib</i> gene                                                                                                                                                  | <i>qnrS</i> gene | <i>qnrS</i> +<br><i>aac(6')-Ib</i> genes |
|              | Detection                                      | S83L Mutation | Detection        | S80L Mutation |                                                                                                                                                                         |                  |                                          |
| Ab1          | +                                              | +             | +                | +             | +                                                                                                                                                                       | -                | -                                        |
| Ab2          | +                                              | +             | +                | +             | +                                                                                                                                                                       | -                | -                                        |
| Ab3          | +                                              | +             | +                | +             | +                                                                                                                                                                       | -                | -                                        |
| Ab4          | +                                              | +             | +                | +             | +                                                                                                                                                                       | -                | -                                        |
| Ab5          | +                                              | +             | -                | -             | +                                                                                                                                                                       | -                | -                                        |
| Ab6          | +                                              | +             | +                | +             | -                                                                                                                                                                       | -                | -                                        |
| Ab7          | +                                              | +             | +                | +             | +                                                                                                                                                                       | -                | -                                        |
| Ab8          | -                                              | -             | +                | +             | +                                                                                                                                                                       | -                | -                                        |
| Ab9          | +                                              | +             | +                | +             | +                                                                                                                                                                       | -                | -                                        |
| Ab10         | +                                              | +             | +                | +             | -                                                                                                                                                                       | -                | -                                        |
| Ab11         | -                                              | -             | +                | +             | +                                                                                                                                                                       | -                | -                                        |
| Ab12         | +                                              | +             | +                | +             | +                                                                                                                                                                       | -                | -                                        |
| Ab13         | +                                              | +             | +                | +             | +                                                                                                                                                                       | -                | -                                        |
| Ab14         | +                                              | +             | +                | +             | +                                                                                                                                                                       | -                | -                                        |
| Ab15         | +                                              | +             | +                | +             | +                                                                                                                                                                       | -                | -                                        |
| Ab16         | +                                              | +             | +                | +             | -                                                                                                                                                                       | -                | -                                        |
| Ab17         | +                                              | +             | +                | +             | -                                                                                                                                                                       | -                | -                                        |
| Ab18         | +                                              | +             | +                | +             | +                                                                                                                                                                       | -                | -                                        |
| Ab19         | +                                              | +             | +                | +             | +                                                                                                                                                                       | -                | -                                        |
| Ab20         | +                                              | +             | +                | +             | +                                                                                                                                                                       | -                | -                                        |
| Ab21         | -                                              | -             | +                | +             | -                                                                                                                                                                       | -                | -                                        |
| Ab22         | +                                              | +             | +                | +             | +                                                                                                                                                                       | -                | -                                        |
| Ab23         | +                                              | +             | +                | +             | +                                                                                                                                                                       | -                | -                                        |
| Ab24         | +                                              | +             | +                | +             | -                                                                                                                                                                       | -                | -                                        |
| Ab25         | +                                              | +             | +                | +             | +                                                                                                                                                                       | -                | -                                        |
| Ab26         | +                                              | +             | +                | +             | +                                                                                                                                                                       | -                | -                                        |
| Ab27         | +                                              | +             | +                | +             | +                                                                                                                                                                       | -                | -                                        |
| Ab28         | +                                              | +             | +                | +             | +                                                                                                                                                                       | -                | -                                        |
| Ab29         | +                                              | +             | +                | +             | +                                                                                                                                                                       | -                | -                                        |
| Ab30         | +                                              | +             | +                | +             | +                                                                                                                                                                       | -                | -                                        |
| Ab31         | +                                              | +             | +                | +             | +                                                                                                                                                                       | -                | -                                        |
| Ab32         | +                                              | +             | +                | +             | +                                                                                                                                                                       | -                | -                                        |
| Ab33         | +                                              | +             | +                | +             | +                                                                                                                                                                       | -                | -                                        |
| Ab34         | +                                              | +             | -                | -             | +                                                                                                                                                                       | -                | -                                        |
| Ab35         | +                                              | +             | -                | -             | +                                                                                                                                                                       | -                | -                                        |
| Ab36         | +                                              | +             | +                | +             | -                                                                                                                                                                       | -                | -                                        |
| Ab37         | -                                              | -             | +                | +             | -                                                                                                                                                                       | -                | -                                        |
| Ab38         | -                                              | -             | +                | +             | +                                                                                                                                                                       | -                | -                                        |
| Ab39         | +                                              | +             | +                | +             | +                                                                                                                                                                       | -                | -                                        |
| Ab40         | +                                              | +             | +                | +             | +                                                                                                                                                                       | -                | -                                        |
| Ab41         | +                                              | +             | +                | +             | +                                                                                                                                                                       | -                | -                                        |
| Ab42         | +                                              | +             | +                | +             | +                                                                                                                                                                       | -                | -                                        |
| Ab43         | +                                              | +             | +                | +             | +                                                                                                                                                                       | -                | -                                        |
| Ab44         | +                                              | +             | +                | +             | +                                                                                                                                                                       | -                | -                                        |
| Ab45         | +                                              | +             | +                | +             | +                                                                                                                                                                       | -                | -                                        |
| Ab46         | +                                              | +             | +                | +             | +                                                                                                                                                                       | -                | -                                        |
| Ab47         | +                                              | +             | +                | +             | +                                                                                                                                                                       | -                | -                                        |

|                                              |           |           |           |           |           |         |         |
|----------------------------------------------|-----------|-----------|-----------|-----------|-----------|---------|---------|
| Ab48                                         | +         | +         | +         | +         | +         | -       | -       |
| Ab49                                         | +         | +         | +         | +         | +         | -       | -       |
| Ab50                                         | +         | +         | +         | +         | +         | -       | -       |
| Ab51                                         | +         | +         | +         | +         | +         | -       | -       |
| Ab52                                         | +         | +         | +         | +         | +         | -       | -       |
| Ab53                                         | +         | +         | +         | +         | +         | -       | -       |
| Ab54                                         | +         | +         | +         | +         | +         | -       | -       |
| Ab55                                         | +         | +         | +         | +         | +         | -       | -       |
| Ab56                                         | +         | +         | +         | +         | -         | -       | -       |
| Ab57                                         | +         | +         | -         | -         | +         | -       | -       |
| Ab58                                         | -         | -         | +         | +         | +         | -       | -       |
| Ab59                                         | -         | -         | -         | -         | -         | -       | -       |
| Ab60                                         | +         | +         | +         | +         | +         | +       | +       |
| Ab61                                         | +         | +         | +         | +         | +         | -       | -       |
| Ab62                                         | +         | +         | +         | +         | +         | -       | -       |
| Ab63                                         | +         | +         | +         | +         | +         | -       | -       |
| Ab64                                         | -         | -         | +         | +         | +         | -       | -       |
| Ab65                                         | +         | +         | +         | +         | +         | +       | +       |
| Ab66                                         | +         | +         | +         | +         | +         | -       | -       |
| Ab67                                         | -         | -         | +         | +         | -         | -       | -       |
| Ab68                                         | +         | +         | +         | +         | +         | -       | -       |
| Ab69                                         | +         | +         | +         | +         | +         | -       | -       |
| Ab70                                         | +         | +         | +         | +         | +         | -       | -       |
| Ab71                                         | +         | +         | +         | +         | -         | -       | -       |
| Ab72                                         | +         | +         | +         | +         | -         | -       | -       |
| Ab73                                         | +         | +         | +         | +         | +         | -       | -       |
| Ab74                                         | +         | +         | +         | +         | +         | -       | -       |
| Ab75                                         | -         | -         | +         | +         | -         | -       | -       |
| Ab76                                         | -         | -         | +         | +         | -         | -       | -       |
| Ab77                                         | +         | +         | +         | +         | -         | -       | -       |
| Ab78                                         | +         | +         | +         | +         | -         | -       | -       |
| Ab79                                         | +         | +         | +         | +         | -         | -       | -       |
| Ab80                                         | +         | +         | +         | +         | -         | -       | -       |
| ATCC 19606                                   | +         | -         | +         | -         | -         | -       | -       |
| ATCC 17987                                   | +         | -         | +         | -         | -         | -       | -       |
| <b>Total number of positive isolates (%)</b> | 69 (86.3) | 69 (86.3) | 75 (93.8) | 75 (93.8) | 61 (76.3) | 2 (2.5) | 2 (2.5) |

(+): Detected or present, (-): Not detected or absent, S80L: Ser80 to Leu and S83L: Ser83 to Leu.

**Supplementary Table S4.** Primers used in this study.

| Gene or DNA region                                                           |                     | Primer                | Nucleotide Sequence (5' - 3') | Annealing temp (°C) | Amplicon size (bp) | Reference |   |
|------------------------------------------------------------------------------|---------------------|-----------------------|-------------------------------|---------------------|--------------------|-----------|---|
| <i>recA</i> gene of <i>Acinetobacter</i> genus                               |                     | <i>p-rA1</i>          | CCTGAATCTTCTGGTAAAAC          | 50                  | 425                | 1         |   |
|                                                                              |                     | <i>p-rA2</i>          | GTTTCTGGGCTGCCAAACATTAC       |                     |                    |           |   |
| The intergenic spacer region region of <i>A. baumannii</i> (16S-23SrRNA ITS) |                     | <i>p-Ab-ITSF</i>      | CATTATCACGGTAATTAGTG          | 50                  | 208                | 2         |   |
|                                                                              |                     | <i>p-Ab-ITSB</i>      | AGAGCACTGTGCACTTAAG           |                     |                    |           |   |
| FQRDRs                                                                       | <i>gyrA</i>         | <i>gyrA-F</i>         | AAATCTGCCCCTGTTCGTTGGT        | 56                  | 343                | 3         |   |
|                                                                              |                     | <i>gyrA-R</i>         | GCCATACCTACGGCGATACC          |                     |                    |           |   |
|                                                                              | <i>parC</i>         | <i>parC-F</i>         | AAACCTGTTTCAGCGCCGCATT        | 54                  | 327                | 4         |   |
|                                                                              |                     | <i>parC-R</i>         | AAAGTTGTCTTGCCATTCACT         |                     |                    |           |   |
| PMQR genes                                                                   | <i>qnrA</i>         | <i>qnrA-F</i>         | AGAGGATTTCTCACGCCAGG          | 57                  | 579                | 5         |   |
|                                                                              |                     | <i>qnrA-R</i>         | TGCCAGGCACAGATCTTGAC          |                     |                    |           |   |
|                                                                              | <i>qnrB</i>         | <i>qnrB-F</i>         | GGMATHGAAATTCGCCACTG          | 56                  | 263                |           |   |
|                                                                              |                     | <i>qnrB-R</i>         | TTYGCBGYCYGCCAGTCGAA          |                     |                    |           |   |
|                                                                              | <i>qnrS</i>         | <i>qnrS-F</i>         | GCAAGTTCATTGAACAGGGT          | 53                  | 427                |           |   |
|                                                                              |                     | <i>qnrS-R</i>         | TCTAAACCGTCGAGTTCGGCG         |                     |                    |           |   |
|                                                                              | <i>qnrC</i>         | <i>qnrC-F</i>         | GGGTTGTACATTTATTGAATCG        | 51                  | 308                |           | 6 |
|                                                                              |                     | <i>qnrC-R</i>         | CACCTACCCATTTATTTTCA          |                     |                    |           |   |
|                                                                              | <i>qnrD</i>         | <i>qnrD-F</i>         | ATGGAAAAGCACTTTATCAA          | 50                  | 645                |           | 7 |
|                                                                              |                     | <i>qnrD-R</i>         | TTATCGGTGAACAATAACAC          |                     |                    |           |   |
| <i>aac(6')-Ib</i>                                                            | <i>aac(6')-Ib-F</i> | CTTGCGATGCTCTATGAGTGG | 57                            | 480                 | 8                  |           |   |
|                                                                              | <i>aac(6')-Ib-R</i> | GAATGCCTGGCGTGTGTTGAA |                               |                     |                    |           |   |
| Efflux pump genes                                                            | <i>oqxAB</i>        | <i>oqxAB-F</i>        | GACGACAAAGCGGTACTGAC          | 56                  | 448                | 7         |   |
|                                                                              |                     | <i>oqxAB-R</i>        | GTCTCGGCAATCACTTTCGG          |                     |                    |           |   |
|                                                                              | <i>qepA</i>         | <i>qepA-F</i>         | TCTACGGGCTCAAGCAGTTG          | 57                  | 380                | 8         |   |
|                                                                              |                     | <i>qepA-R</i>         | ACAGCGAACCGATGACGAAG          |                     |                    |           |   |

Temp: temperature, F: forward, R: reverse, bp: base pair, FQRDRs: fluoroquinolone resistance-determining regions, and PMQR: plasmid-mediated quinolone resistance.

**Supplementary Table S5.** Effect of CCCP on the MICs of plain PCL nanoparticles, CIP, and LEV against representative fluoroquinolone (FQ)-resistant and extensively drug-resistant (XDR) *A. baumannii* isolates and standard strains *A. baumannii* ATCC 19606 and 17978.

| Isolate code      | MIC* (µg/ml) |      |            |                    | MDF |
|-------------------|--------------|------|------------|--------------------|-----|
|                   | Plain        | CIP  | CIP + CCCP | Plain + CIP + CCCP |     |
| <b>Ab29</b>       | -            | 32   | 32         | 32                 | 1   |
| <b>Ab30</b>       | -            | 32   | 8          | 8                  | 4   |
| <b>Ab36</b>       | -            | 32   | 32         | 32                 | 1   |
| <b>Ab60</b>       | -            | 128  | 16         | 16                 | 8   |
| <b>Ab65</b>       | -            | 64   | 64         | 64                 | 1   |
| <b>Ab71</b>       | -            | 64   | 64         | 64                 | 1   |
| <b>Ab72</b>       | -            | 64   | 16         | 16                 | 4   |
| <b>Ab77</b>       | -            | 64   | 64         | 64                 | 1   |
| <b>ATCC 19606</b> | -            | 0.5  | 0.5        | 0.5                | 1   |
| <b>ATCC 17987</b> | -            | 0.25 | 0.25       | 0.25               | 1   |

  

| Isolate code      | MIC* (µg/ml) |      |            |                    | MDF |
|-------------------|--------------|------|------------|--------------------|-----|
|                   | Plain        | LEV  | LEV + CCCP | Plain + LEV + CCCP |     |
| <b>Ab29</b>       | -            | 8    | 8          | 8                  | 1   |
| <b>Ab30</b>       | -            | 8    | 2          | 2                  | 4   |
| <b>Ab36</b>       | -            | 8    | 8          | 8                  | 1   |
| <b>Ab60</b>       | -            | 16   | 4          | 4                  | 4   |
| <b>Ab65</b>       | -            | 16   | 16         | 16                 | 1   |
| <b>Ab71</b>       | -            | 8    | 8          | 8                  | 1   |
| <b>Ab72</b>       | -            | 8    | 2          | 2                  | 4   |
| <b>Ab77</b>       | -            | 8    | 8          | 8                  | 1   |
| <b>ATCC 19606</b> | -            | 0.5  | 0.5        | 0.5                | 1   |
| <b>ATCC 17987</b> | -            | 0.25 | 0.25       | 0.25               | 1   |

MIC: minimum inhibitory concentration, CIP: ciprofloxacin, LEV: levofloxacin, PCL: poly  $\epsilon$ -caprolactone, Plain: plain PCL nanoparticles, MDF: MIC decrease factor, and CCCP: carbonyl-cyanide-m-chlorophenylhydrazone.

\*: The mean MIC value was reported after experiments were carried out in duplicate.



**Supplementary Table S6.** Distribution of *A. baumannii* isolates and standard strains *A. baumannii* ATCC 19606 and 17978 according to biofilm formation.

| Isolate code                                                                                                                                                              | Biofilm formation | OD*   | Isolate code | Biofilm formation | OD*   |
|---------------------------------------------------------------------------------------------------------------------------------------------------------------------------|-------------------|-------|--------------|-------------------|-------|
| Ab1                                                                                                                                                                       | N                 | 0.022 | Ab41         | S                 | 0.402 |
| Ab2                                                                                                                                                                       | W                 | 0.095 | Ab42         | S                 | 0.322 |
| Ab3                                                                                                                                                                       | S                 | 0.522 | Ab43         | W                 | 0.128 |
| Ab4                                                                                                                                                                       | S                 | 0.489 | Ab44         | M                 | 0.27  |
| Ab5                                                                                                                                                                       | S                 | 0.451 | Ab45         | S                 | 0.341 |
| Ab6                                                                                                                                                                       | S                 | 0.422 | Ab46         | W                 | 0.121 |
| Ab7                                                                                                                                                                       | W                 | 0.115 | Ab47         | S                 | 0.364 |
| Ab8                                                                                                                                                                       | S                 | 0.391 | Ab48         | S                 | 0.373 |
| Ab9                                                                                                                                                                       | N                 | 0.028 | Ab49         | S                 | 0.391 |
| Ab10                                                                                                                                                                      | S                 | 0.371 | Ab50         | S                 | 0.322 |
| Ab11                                                                                                                                                                      | W                 | 0.132 | Ab51         | W                 | 0.123 |
| Ab12                                                                                                                                                                      | S                 | 0.42  | Ab52         | S                 | 0.331 |
| Ab13                                                                                                                                                                      | S                 | 0.373 | Ab53         | S                 | 0.322 |
| Ab14                                                                                                                                                                      | W                 | 0.123 | Ab54         | S                 | 0.385 |
| Ab15                                                                                                                                                                      | S                 | 0.521 | Ab55         | S                 | 0.391 |
| Ab16                                                                                                                                                                      | S                 | 0.432 | Ab56         | S                 | 0.372 |
| Ab17                                                                                                                                                                      | S                 | 0.367 | Ab57         | S                 | 0.356 |
| Ab18                                                                                                                                                                      | S                 | 0.395 | Ab58         | M                 | 0.19  |
| Ab19                                                                                                                                                                      | S                 | 0.421 | Ab59         | M                 | 0.272 |
| Ab20                                                                                                                                                                      | S                 | 0.478 | Ab60         | S                 | 0.45  |
| Ab21                                                                                                                                                                      | S                 | 0.341 | Ab61         | M                 | 0.202 |
| Ab22                                                                                                                                                                      | S                 | 0.357 | Ab62         | M                 | 0.192 |
| Ab23                                                                                                                                                                      | S                 | 0.364 | Ab63         | M                 | 0.183 |
| Ab24                                                                                                                                                                      | W                 | 0.131 | Ab64         | M                 | 0.173 |
| Ab25                                                                                                                                                                      | S                 | 0.398 | Ab65         | S                 | 0.319 |
| Ab26                                                                                                                                                                      | S                 | 0.38  | Ab66         | M                 | 0.265 |
| Ab27                                                                                                                                                                      | S                 | 0.351 | Ab67         | M                 | 0.269 |
| Ab28                                                                                                                                                                      | S                 | 0.284 | Ab68         | W                 | 0.082 |
| Ab29                                                                                                                                                                      | S                 | 0.371 | Ab69         | S                 | 0.402 |
| Ab30                                                                                                                                                                      | S                 | 0.541 | Ab70         | M                 | 0.27  |
| Ab31                                                                                                                                                                      | S                 | 0.356 | Ab71         | S                 | 0.396 |
| Ab32                                                                                                                                                                      | S                 | 0.381 | Ab72         | S                 | 0.47  |
| Ab33                                                                                                                                                                      | S                 | 0.394 | Ab73         | M                 | 0.269 |
| Ab34                                                                                                                                                                      | S                 | 0.322 | Ab74         | M                 | 0.232 |
| Ab35                                                                                                                                                                      | S                 | 0.341 | Ab75         | M                 | 0.217 |
| Ab36                                                                                                                                                                      | S                 | 0.542 | Ab76         | M                 | 0.267 |
| Ab37                                                                                                                                                                      | M                 | 0.25  | Ab77         | S                 | 0.328 |
| Ab38                                                                                                                                                                      | S                 | 0.361 | Ab78         | M                 | 0.247 |
| Ab39                                                                                                                                                                      | W                 | 0.125 | Ab79         | W                 | 0.123 |
| Ab40                                                                                                                                                                      | S                 | 0.375 | Ab80         | M                 | 0.212 |
| ATCC 19606                                                                                                                                                                | S                 | 0.301 | ATCC 17987   | S                 | 0.335 |
| Total Number (%) of strong (S), moderate (M), week (W), and non (N)- biofilm forming isolates are 50 (62.5%), 17 (21.3%), 11 (13.8%) and 2 (2.5%) isolates, respectively. |                   |       |              |                   |       |

\*: The values represent the mean  $\pm$  SD of each isolate's optical density (OD) of four wells.

**Supplementary Table S7.** Ingredients of the prepared nanoparticles.

| Ingredients<br>% (w/v) |     | Formula<br>Parameter |     | F <sub>CIP</sub> | F <sub>LEV</sub> | Plain NPs |
|------------------------|-----|----------------------|-----|------------------|------------------|-----------|
|                        |     | O                    | PCL | 1.5              | 1.5              | 1.5       |
| W <sub>1</sub>         | CIP | 2                    | --- | ---              |                  |           |
|                        | LEV | ---                  | 2   | ---              |                  |           |
| W <sub>2</sub>         | PVA | 0.5                  | 0.5 | 0.5              |                  |           |

CIP: ciprofloxacin, LEV: levofloxacin, F<sub>CIP</sub>: CIP-loaded nanoparticles, F<sub>LEV</sub>: LEV-loaded nanoparticles, Plain NPs: plain PCL nanoparticles, O: organic phase, W<sub>1</sub>: internal aqueous phase, W<sub>2</sub>: external aqueous phase, PCL: poly  $\epsilon$ -caprolactone, and PVA: polyvinyl alcohol.

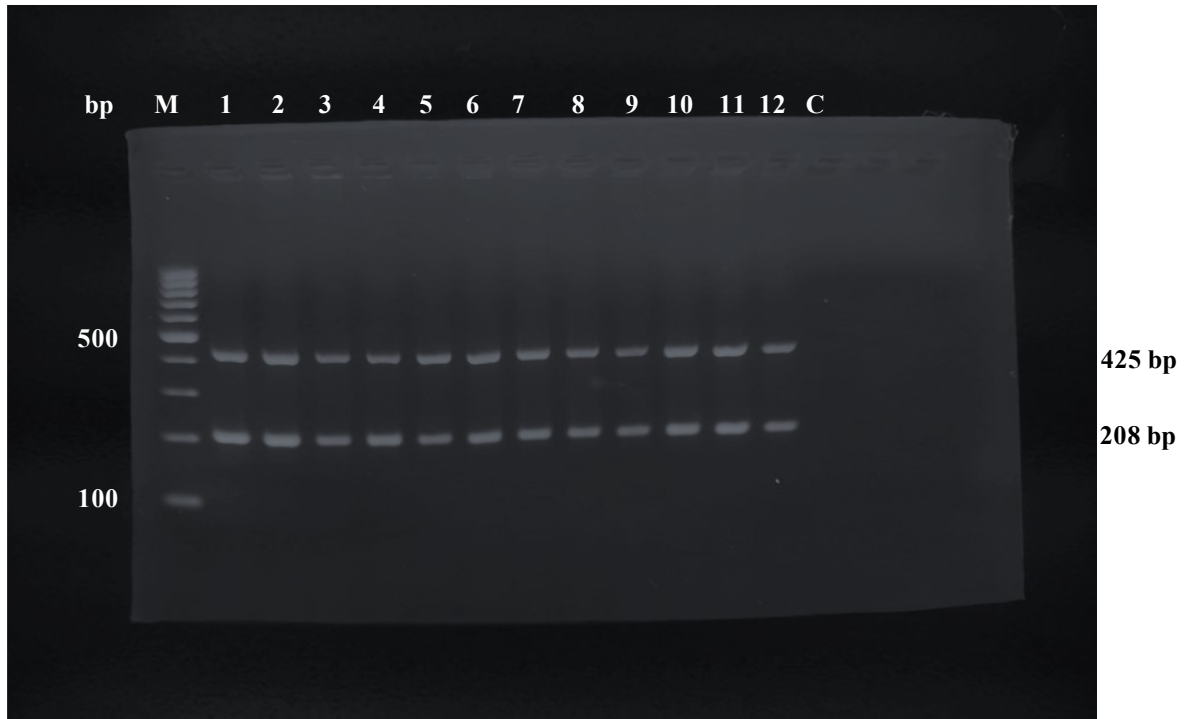

**Supplementary Fig. S1.** Multiplex PCR for detection of *recA* gene (characteristic of the *Acinetobacter* genus) (425 bp) and *16S-23S rRNA* gene intergenic spacer (*ITS*) region (specific for *A. baumannii* spp.) (208 bp) in representative isolates of *A. baumannii*. Lane M: 100 bp DNA ladder, Lanes 1-10: positive isolates of *A. baumannii* (Ab1-10), Lanes 11 and 12 represent *A. baumannii* ATCC 19606 and 17978, respectively, Lane C: negative control (PCR reaction without DNA template), and bp: base pairs.

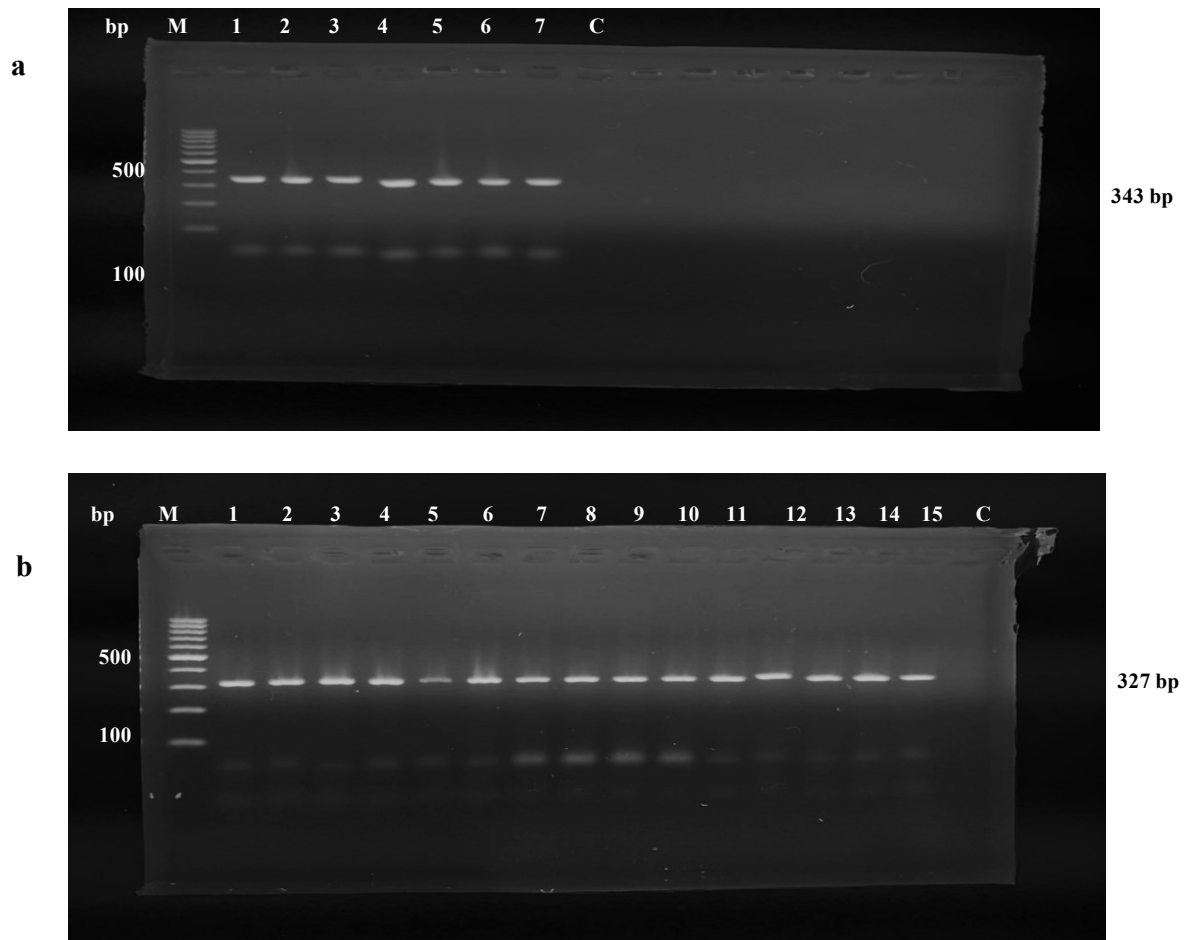

**Supplementary Fig. S2.** Detection of mutation in the fluoroquinolone resistance-determining regions (FQRDRs) after *HinfI* digestion of the PCR products of *gyrA* and *parC* genes. **a)** Mutation in the FQRDRs of *gyrA* is indicated by undigested fragment (343 bp) and Lanes 1-15 represent *A. baumannii* (Ab20-34) and Lanes 1-7 represent undigested fragments of *A. baumannii* (Ab1-7). **b)** Mutation in the FQRDRs of *parC* is indicated by undigested fragment (327 bp) and Lanes 1-15 represent undigested fragments of *A. baumannii* (Ab1-15). Lane M: 100 bp DNA ladder, Lane C: negative control (PCR reaction without DNA template) and bp: base pairs.

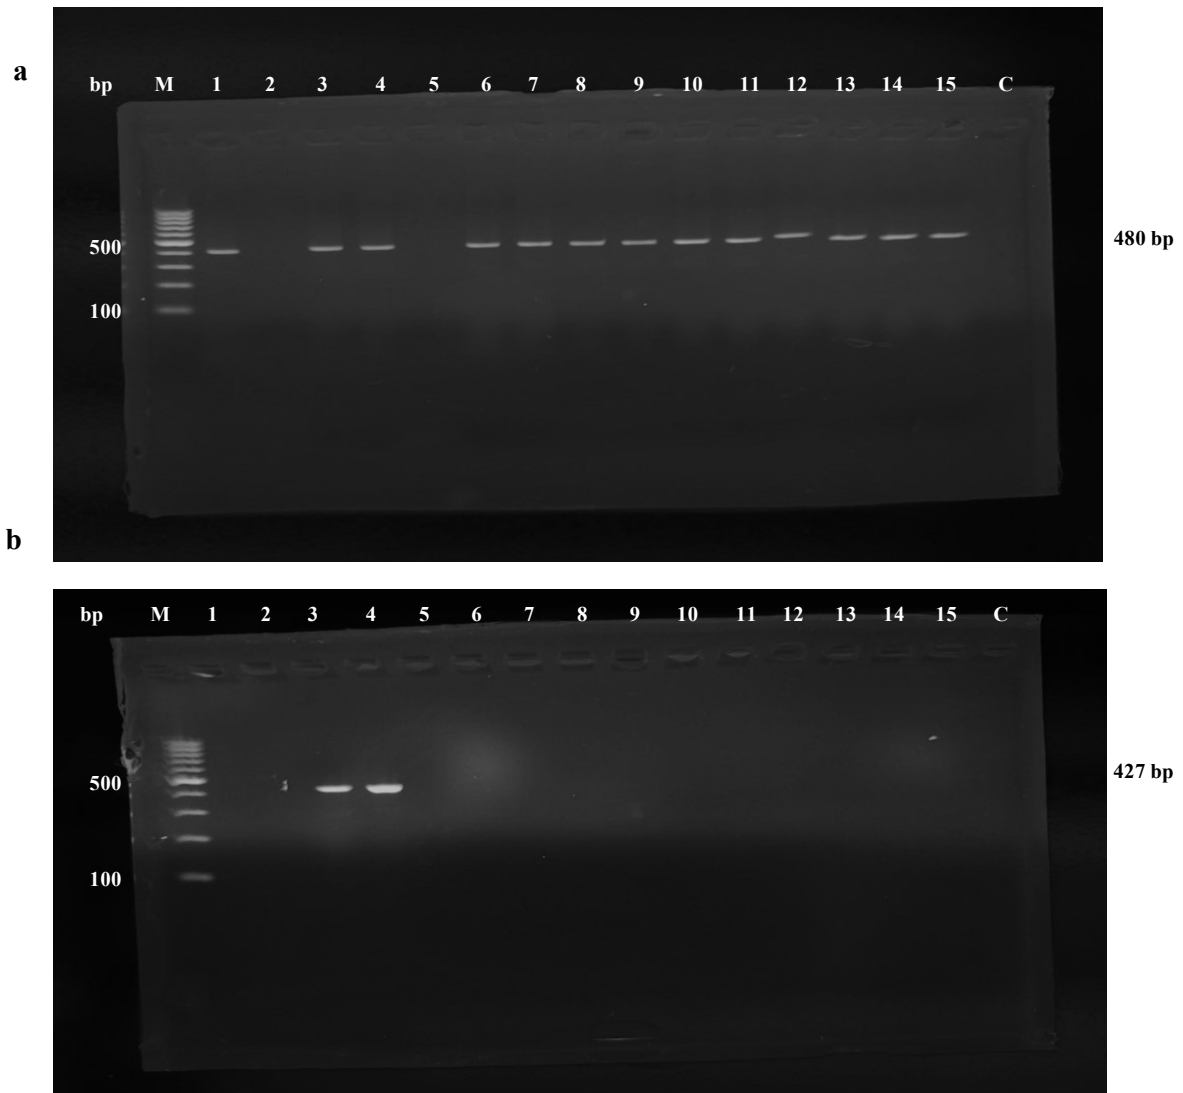

**Supplementary Fig. S3.** Detection of the plasmid-mediated quinolone resistance (PMQR) genes of PCR products of *aac(6′)-Ib* and *qnrS* genes. **a)** *aac(6′)-Ib* gene (480 bp) and Lanes 1-15 represent *A. baumannii* (Ab20-34), **b)** *qnrS* gene (427 bp) and Lanes 1-15 represent *A. baumannii* (Ab58-60 and Ab65-76). Lane M: 100 bp DNA ladder, Lane C: negative control (PCR reaction without DNA template) and bp: base pairs.

## References:

- 1 Krawczyk, B., Lewandowski, K. & Kur, J. Comparative studies of the *Acinetobacter* genus and the species identification method based on the *recA* sequences. *Mol Cell Probes* **16**, 1-11, doi:10.1006/mcpr.2001.0388 (2002).
- 2 Chen, T. L. *et al.* Comparison of one-tube multiplex PCR, automated ribotyping and intergenic spacer (ITS) sequencing for rapid identification of *Acinetobacter baumannii*. *Clin Microbiol Infect* **13**, 801-806, doi:10.1111/j.1469-0691.2007.01744.x (2007).
- 3 Vila, J., Ruiz, J., Goñi, P., Marcos, A. & Jimenez de Anta, T. Mutation in the *gyrA* gene of quinolone-resistant clinical isolates of *Acinetobacter baumannii*. *Antimicrob Agents Chemother* **39**, 1201-1203, doi:10.1128/aac.39.5.1201 (1995).
- 4 Vila, J., Ruiz, J., Goñi, P. & Jimenez de Anta, T. Quinolone-resistance mutations in the topoisomerase IV *parC* gene of *Acinetobacter baumannii*. *J Antimicrob Chemother* **39**, 757-762, doi:10.1093/jac/39.6.757 (1997).
- 5 Cattoir, V., Poirel, L., Rotimi, V., Soussy, C. J. & Nordmann, P. Multiplex PCR for detection of plasmid-mediated quinolone resistance *qnr* genes in ESBL-producing enterobacterial isolates. *J Antimicrob Chemother* **60**, 394-397, doi:10.1093/jac/dkm204 (2007).
- 6 Kim, H. B. *et al.* Prevalence of Plasmid-Mediated Quinolone Resistance Determinants over a 9-Year Period. *Antimicrobial Agents and Chemotherapy* **53**, 639-645, doi:doi:10.1128/AAC.01051-08 (2009).
- 7 Rodríguez-Martínez, J. M. *et al.* Plasmid-mediated quinolone resistance: Two decades on. *Drug Resistance Updates* **29**, 13-29, doi:<https://doi.org/10.1016/j.drug.2016.09.001> (2016).
- 8 Hamed, S. M. *et al.* Plasmid-Mediated Quinolone Resistance in Gram-Negative Pathogens Isolated from Cancer Patients in Egypt. *Microb Drug Resist* **24**, 1316-1325, doi:10.1089/mdr.2017.0354 (2018).
